# Supplementary material for: Temporal and genetic variation in female aggression after mating
Source: PLoS One. 2020 Apr 29;15(4):e0229633. doi: 10.1371/journal.pone.0229633 (PMC7190144; doi:10.1371/journal.pone.0229633)
Supplement: S6 Fig — Colours indicate the genotype of the male that a female mated with–blue = Canton-S, yellow = Dahomey, red = w1118, empty circle = virgin female. Black bars indicate treatment means ± 1 standard error. (DOCX) [file pone.0229633.s006.docx]

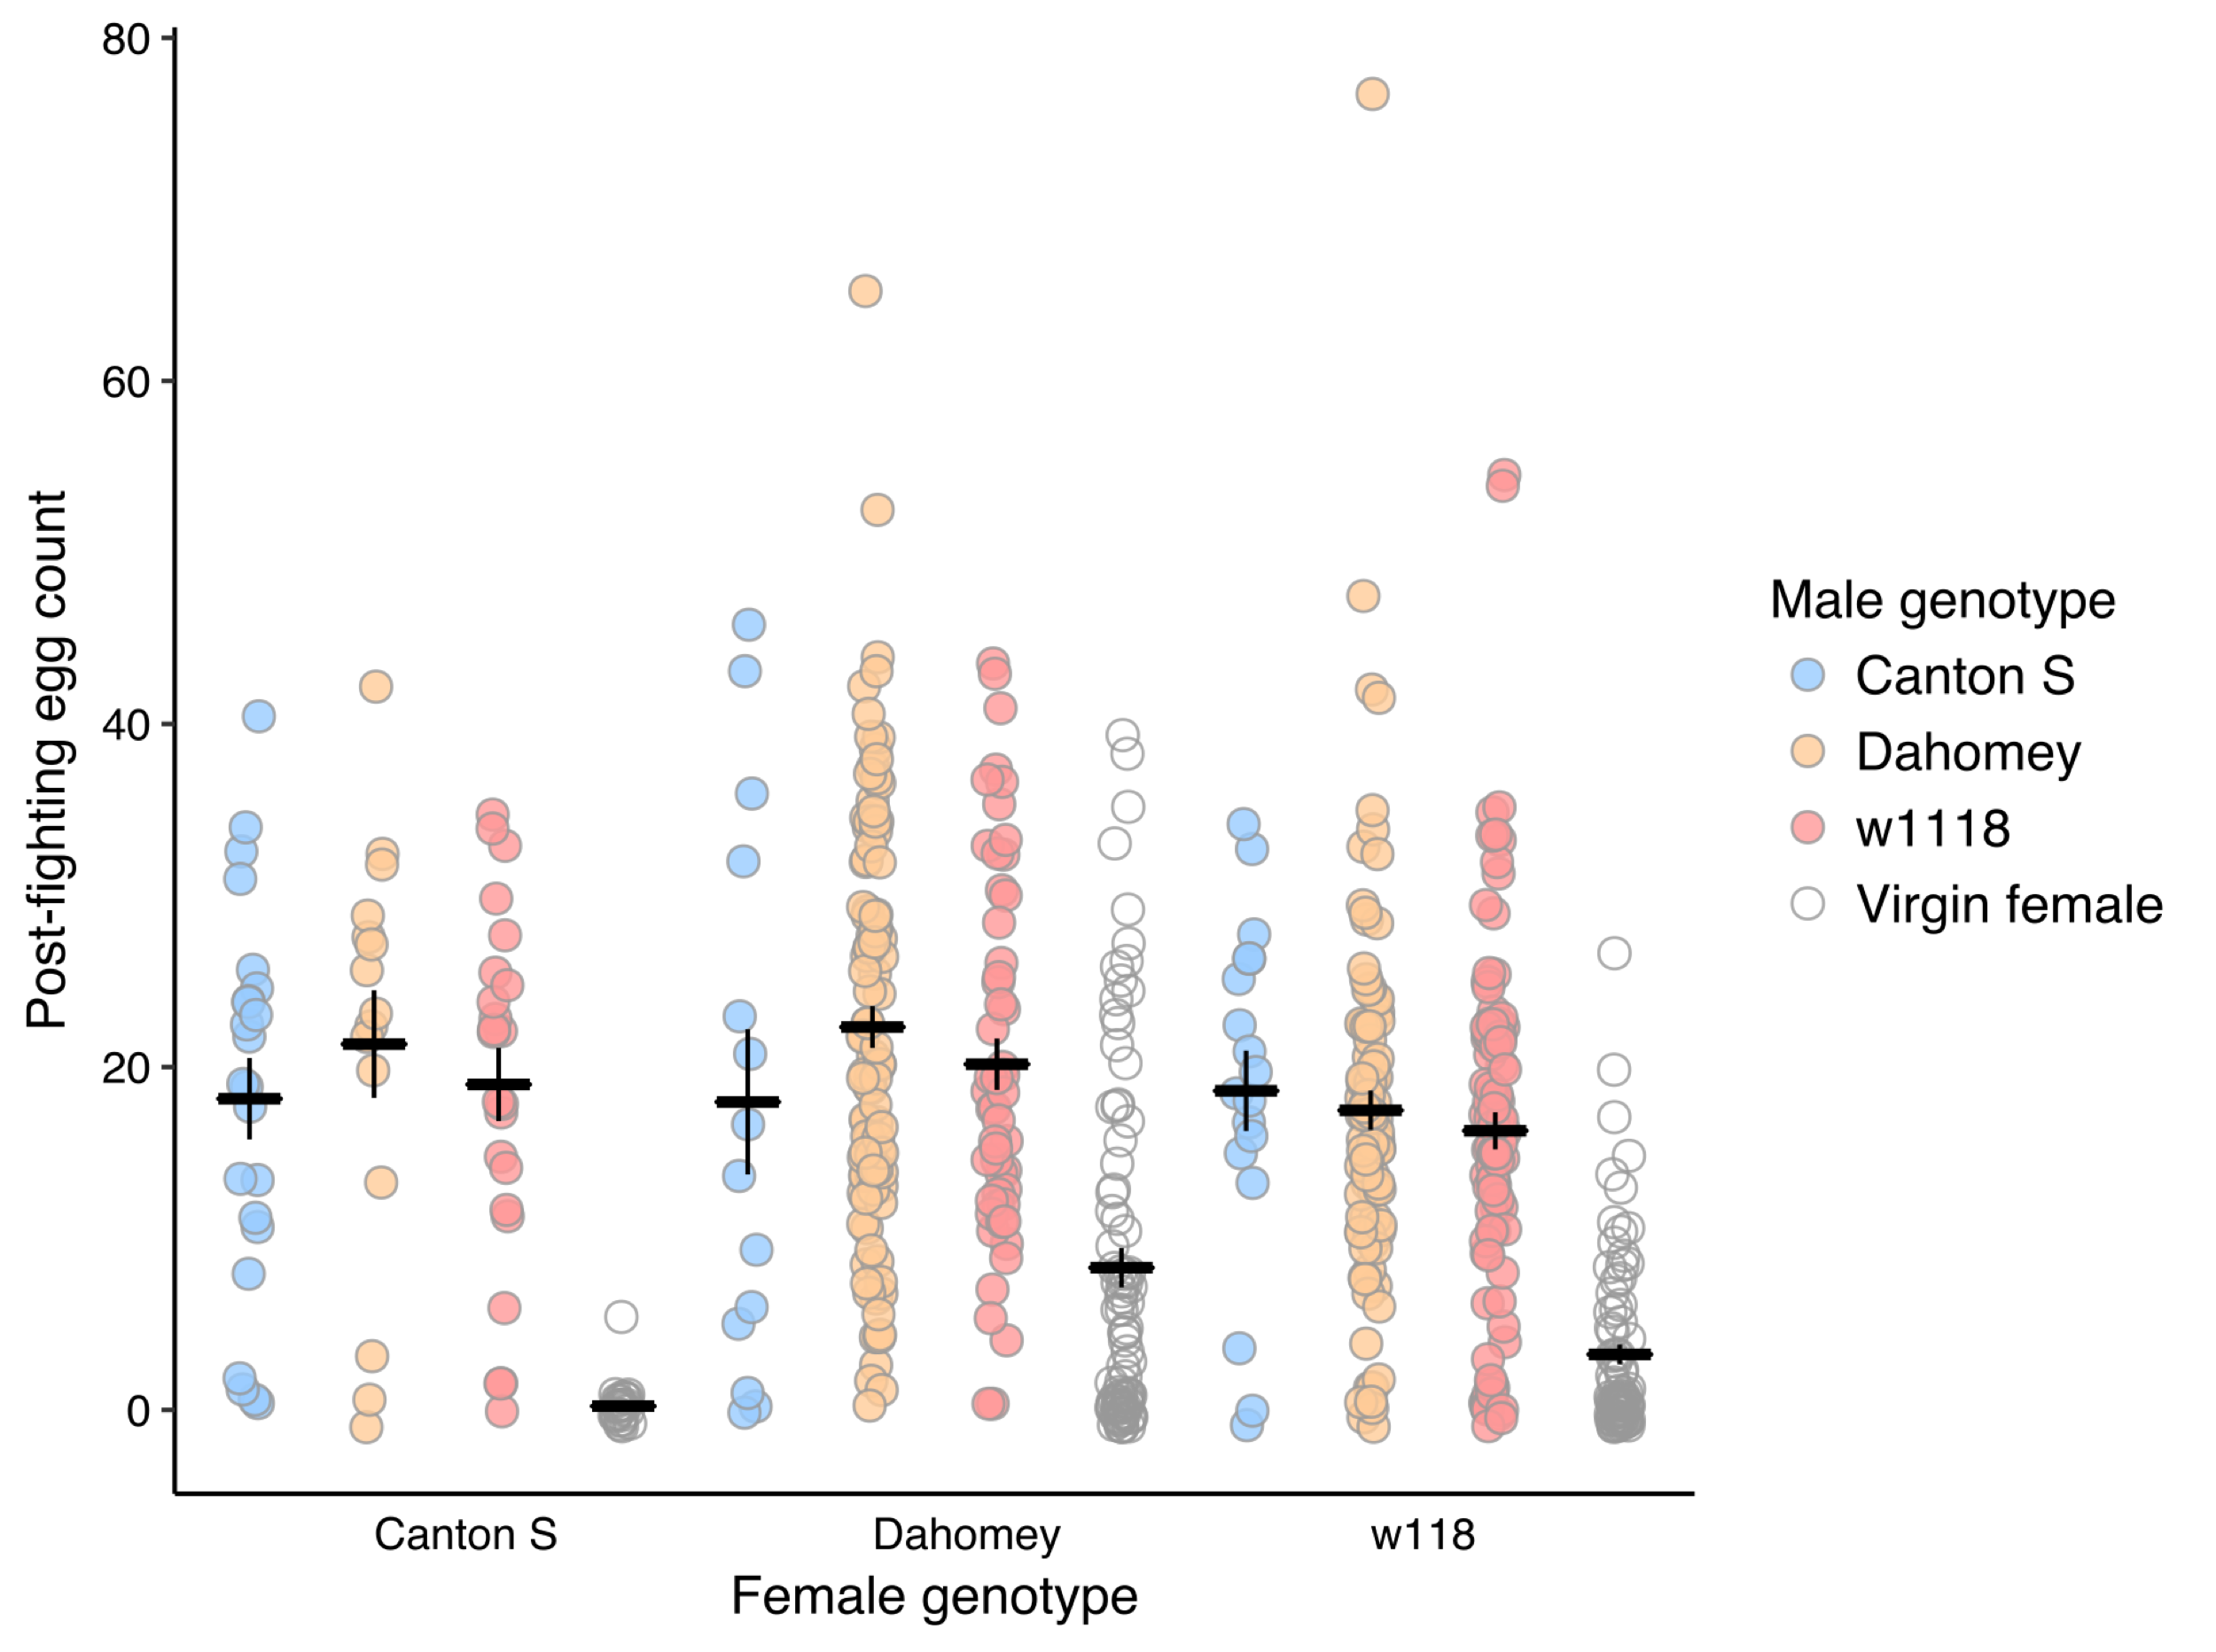


**Supplementary Figure 6: Egg counts for 24 hours post-contest (48-72 hours post-mating)**

Colours indicate the genotype of the male that a female mated with – blue = Canton-S, yellow = Dahomey, red = *w1118*, empty circle = virgin female. Black bars indicate treatment means ± 1 standard error.
